# Supplementary material for: Origin and Diversification of Basic-Helix-Loop-Helix Proteins in Plants
Source: PubMed Central journal article supplement — Mol Biol Evol. 2009 Nov 25;27(4):862–74. doi: 10.1093/molbev/msp288 (PMC2839125; doi:10.1093/molbev/msp288), 2009-11-25
Supplement: msp288_1.pdf [file msp288_1.pdf]

|            |                      |       |     |     |    |             |          |                                  |                                    |
|------------|----------------------|-------|-----|-----|----|-------------|----------|----------------------------------|------------------------------------|
| AtbHLH030  | AQEIMDAKALA-A-SKSH   | SEA-E | RRR | RER | -- | IN-NH-LAKLR | S-ILP    | WT-TR-TD                         | KAS-LL-AEVIQHWKELKROTSVISETNVYVSDR |
| AtbHLH043  | DCVGGIEKAES-L-SRSH   | SLA-E | RER | RER | -- | SH-LTALR    | K-LVP    | NS-DK-LD                         | KAA-LL-ATWIGQWELKQKAASPIQDFLPEA    |
| AtbHLH106  | GETMAODRALA-A-LRHH   | KEA-E | RRR | RER | -- | SH-LNKLR    | N-VLS    | CN-SK-TD                         | KAT-LL-AKVUVRELKQQLTESDSDTFLPS     |
| AtbHLH032  | AQEIMDAKALA-A-SKSH   | SEA-E | RRR | RER | -- | IN-TH-LAKLR | S-ILP    | NT-TK-TD                         | KAS-LL-AEVIQHWKELKROTSVISETNVYVSDR |
| SmbHLH046  | SAQADNAKALA-A-SKSH   | SEA-E | RRR | RER | -- | IN-KH-LSTR  | T-LIP    | NT-AK-TD                         | KAS-LL-AEVIQHWKELKROTSVISETNVYVSDR |
| SmbHLH049  | SAQADNAKALA-A-SKSH   | SEA-E | RRR | RER | -- | IN-KH-LSTR  | T-LIP    | NT-AK-TD                         | KAS-LL-AEVIQHWKELKROTSVISETNVYVSDR |
| SmbHLH056  | FCBTDIADAKALA-A-SKSH | SEA-E | RRR | RER | -- | IN-NH-LAKLR | C-LIP    | ST-TK-TD                         | KAS-LL-AEVIQHWKELKROTSVISETNVYVSDR |
| SmbHLH063  | SGSRSAQAQT-A-MTH     | SEA-E | RRR | RER | -- | IN-NH-LAKLR | C-LIP    | ST-TK-TD                         | KAS-LL-AEVIQHWKELKROTSVISETNVYVSDR |
| AtbHLH036  | SGSRSAQAQT-A-MTH     | SEA-E | RRR | RER | -- | IN-AH-LAKLR | R-LIP    | DK-KO-MD                         | KAT-LL-ASVUNQWELKQKTRATETPTAATIP   |
| AtbHLH107  | FATVYEDKALA-S-LRHH   | KEA-E | RKR | RAR | -- | SH-LNKLR    | K-LLS    | CN-SK-TD                         | KST-LL-AKVUVRELKQQLTESDSDTFLPS     |
| OsblHLH040 | AQEIMDAKALA-A-SKSH   | SEA-E | RRR | RER | -- | IN-AH-LAKLR | S-ILP    | NT-TK-TD                         | KAS-LL-AEVIQHWKELKROTSVISETNVYVSDR |
| OsblHLH041 | AAAAADRALA-A-SRHH    | REA-E | RKR | RER | -- | IK-SH-LDRLR | A-VLA    | CD-PR-ID                         | KAS-LL-AKAVRVDLKRQMAIGEAAPALFP     |
| OsblHLH035 | SGSGATEAR-A-LKTH     | SEA-E | RRR | RER | -- | IN-AH-LAKLR | R-MIP    | DT-KO-MD                         | KAT-LL-ARVUDQWELKQKASITORTPTLPEE   |
| OsblHLH038 | AKEMADAKALA-A-SRSH   | SEA-E | RRR | RER | -- | IN-GH-LAKLR | S-LIP    | NT-TK-TD                         | KAS-LL-AEVIQHWKELKROTSVISETNVYVSDR |
| OsblHLH042 | SAAVRKGGSF-A-VRSH    | SEA-E | RRR | RER | -- | IN-AH-LAKLR | T-LVP    | SA-SR-MD                         | KAA-LL-GEVUVRELKQKADATETADVDFG     |
| OsblHLH037 | CGGSEKKAAM-A-LKSH    | SEA-E | RRR | RER | -- | IN-AH-LAKLR | T-MVP    | DT-DR-MD                         | KAA-LL-AEVVHWKELKQSAARVRRATVPSA    |
| OsblHLH039 | AREIMADAKALA-A-SRSH  | SEA-E | RRR | RER | -- | IN-GH-LAKLR | S-LIP    | NT-TK-TD                         | KAS-LL-AEVIQHWKELKROTSVISETNVYVSDR |
| PfblHLH027 | ASSRPRKRNVRIS-KDPO   | SVA-A | RUR | RER | -- | IS-DR-IRVLQ | R-LVP    | GG-TK-MD                         | TAS-ML-DEAIHYVFKLQVQLLEQIQQNGGDP   |
| PfblHLH074 | EGRSYNGKVPATS-VEPO   | SVA-A | RUR | RER | -- | IS-ER-IRVLE | K-LIP    | GG-NK-MD                         | TAT-ML-DEAIHYVFKLQVQLLEQIQQNGGDP   |
| AtbHLH088  | AVRPFKRNVRIS-KDPO    | SVA-A | RUR | RER | -- | IS-ER-IRVLE | R-LVP    | GG-TK-MD                         | TAS-ML-DEAIHYVFKLQVQLLEQIQQNGGDP   |
| AtbHLH122  | AVRPFKRNVRIS-SDPO    | SVA-A | RUR | RER | -- | IS-DR-IRVLQ | R-LVP    | GG-NK-MD                         | TAS-ML-DEAIHYVFKLQVQLLEQIQQNGGDP   |
| AtbHLH140  | GNTKRSSTSTLS-SDPO    | SVA-A | RDR | RUR | -- | IS-DR-FKILQ | S-MVP    | GG-AK-MD                         | TVS-ML-DEAIHYVFKLQVQLLEQIQQNGGDP   |
| AtbHLH117  | AGERFRNVRIS-SDPO     | SVA-A | ROR | RER | -- | IS-ER-IRVLE | K-LVP    | GG-AK-MD                         | TAS-ML-DEAIHYVFKLQVQLLEQIQQNGGDP   |
| OsblHLH121 | TVRPFKRNVRIS-SDPO    | SVA-A | RMR | RER | -- | IS-ER-IRVLE | R-LVP    | GG-TK-MD                         | TAS-ML-DEAIHYVFKLQVQLLEQIQQNGGDP   |
| AtbHLH037  | SVKPFKRNVRIS-KDPO    | SVA-A | RUR | RER | -- | IS-ER-IRVLE | R-LVP    | GG-TK-MD                         | TAS-ML-DEAIHYVFKLQVQLLEQIQQNGGDP   |
| OsblHLH123 | RGGRRRPGAKLS-SDPO    | SVA-A | RER | RHR | -- | IS-DR-FRVLQ | S-LVP    | GG-NK-MD                         | TVS-ML-DEAIHYVFKLQVQLLEQIQQNGGDP   |
| PfblHLH081 | EGRLCCKPATS-VEPO     | SVA-A | RUR | RER | -- | IS-ER-IRVLE | K-LIP    | GG-NK-MD                         | TAT-ML-DEAIHYVFKLQVQLLEQIQQNGGDP   |
| OsblHLH119 | AVRPFKRNVRIS-SDPO    | SVA-A | RUR | RER | -- | IS-ER-IRVLE | R-LVP    | GG-TK-MD                         | TAS-ML-DEAIHYVFKLQVQLLEQIQQNGGDP   |
| PfblHLH035 | VQLRFRNVRIS-KDPO     | SVA-A | RUR | RER | -- | IS-DR-VRVLQ | R-FVP    | GG-TK-MD                         | TAS-ML-DEAIHYVFKLQVQLLEQIQQNGGDP   |
| AtbHLH040  | TVRPFKRNVRIS-SDPO    | SVA-A | RMR | RER | -- | IS-EK-IRILK | GG-AK-MD | TAS-ML-DEAIHYVFKLQVQLLEQIQQNGGDP |                                    |
| AtbHLH052  | WTEQDTRKRELS--AQ     | SIA-A | RKR | RRR | -- | IK-EK-TQELG | K-LIP    | GG-OR-IN                         | TAF-ML-NAAKRVFKLQVQLLEQIQQNGGDP    |
| AtbHLH053  | RQDDSDSKFTLS--SQ     | SIA-A | RKR | RRR | -- | IA-EK-THELQ | GG-NK-LN | TAF-ML-NAAKRVFKLQVQLLEQIQQNGGDP  |                                    |
| OsblHLH178 | DDHDDRHRRHHH--QAVQ   | SAA-A | RER | RRR | -- | IS-SK-TAELS | R-LIP    | GA-AR-MNS                        | TAF-ML-QAARVRLQVQLLEQIQQNGGDP      |
| AtbHLH110  | AVRPFKRNVRIS-KDPO    | SVA-A | RUR | RER | -- | IS-ER-IRVLE | R-LVP    | GG-TK-MD                         | TAS-ML-DEAIHYVFKLQVQLLEQIQQNGGDP   |
| AtbHLH124  | VIKFRNVRIS-SDPO      | SVA-A | RUR | RER | -- | IS-ER-IRVLE | R-LVP    | GG-TK-MD                         | TAS-ML-DEAIHYVFKLQVQLLEQIQQNGGDP   |
| PfblHLH096 | ASSRPRKRNVRIS-IDPO   | SVA-A | RUR | RER | -- | IS-DR-IRVLQ | R-LVP    | GG-TK-MD                         | TAS-ML-DEAIHYVFKLQVQLLEQIQQNGGDP   |
| AtbHLH043  | TVRPFKRNVRIS-SDPO    | SVA-A | RUR | RER | -- | IS-ER-IRVLE | R-LVP    | GG-TK-MD                         | TAS-ML-DEAIHYVFKLQVQLLEQIQQNGGDP   |
| PfblHLH045 | AVRPFKRNVRIS-SDPO    | SVA-A | RUR | RER | -- | IS-DR-VRVLQ | R-FVP    | GG-TK-MD                         | TAS-ML-DEAIHYVFKLQVQLLEQIQQNGGDP   |
| PfblHLH069 | ASSRPRKRNVRIS-KDPO   | SVA-A | RUR | RER | -- | IS-DR-IRVLQ | R-LVP    | GG-TK-MD                         | TAS-ML-DEAIHYVFKLQVQLLEQIQQNGGDP   |
| PfblHLH026 | AVRPFKRNVRIS-KDPO    | SVA-A | RUR | RER | -- | IS-DR-VRVLQ | R-FVP    | GG-TK-MD                         | TAS-ML-DEAIHYVFKLQVQLLEQIQQNGGDP   |
| OsblHLH086 | EDYIHYVARRGQA-TDGH   | SLA-E | RVR | REK | -- | IS-ER-MKFLQ | D-LVP    | CC-SKITG                         | KAV-ML-DEIHYVQSLQVQLLEQIQQNGGDP    |
| AtbHLH087  | LYVVIHYVARRGQA-TDGH  | SLA-E | RVR | REK | -- | IS-EK-IRVLQ | T-LVP    | GG-TK-MD                         | TAS-ML-DEAIHYVFKLQVQLLEQIQQNGGDP   |
| SmbHLH044  | GGHGSFYSYFKEIT-VEPO  | SIA-A | ROR | RKK | -- | IS-ER-VRELE | K-LVP    | GG-NK-LD                         | TAS-ML-DEAIHYVFKLQVQLLEQIQQNGGDP   |
| SmbHLH051  | GGHGSFYSYFKEIT-VEPO  | SIA-A | ROR | RKK | -- | IS-ER-VRELE | K-LVP    | GG-NK-LD                         | TAS-ML-DEAIHYVFKLQVQLLEQIQQNGGDP   |
| SmbHLH071  | GGHGSFYSYFKEIT-VEPO  | SIA-A | ROR | RKK | -- | IS-ER-VRELE | K-LVP    | GG-NK-LD                         | TAS-ML-DEAIHYVFKLQVQLLEQIQQNGGDP   |
| SmbHLH074  | GGHGSFYSYFKEIT-VEPO  | SIA-A | ROR | RKK | -- | IS-ER-VRELE | K-LVP    | GG-NK-LD                         | TAS-ML-DEAIHYVFKLQVQLLEQIQQNGGDP   |
| AtbHLH117  | NSSTSSSTSGSP-TASH    | MMK-E | RKR | RRR | -- | IK-DR-ITELQ | K-LIP    | GG-RE-MD                         | LAM-VL-DEAIHYVFKLQVQLLEQIQQNGGDP   |
| AtbHLH109  | DEEYRMAKRAKRA--RSH   | MMK-E | RKR | RRR | -- | IK-DR-ITELQ | K-LIP    | GG-RE-MD                         | LAM-VL-DEAIHYVFKLQVQLLEQIQQNGGDP   |
| AtbHLH108  | KRRVTCQVKSDD-KSDHD   | TLL-K | RKR | RER | -- | IR-RQ-LTELK | GG-TP-MD | INQ-ED-MD                        | INA-LL-DCVIEYNNLRALHYKSGQICDDWRL   |
| OsblHLH176 | FFSILAFADATA-AVFN    | LQV-- | R   | REK | -- | IS-ER-MKFLQ | D-LVP    | CC-NKVFQ                         | KAV-ML-DEIHYVQSLQVQLLEQIQQNGGDP    |
| AtbHLH074  | ENYIHYVARRGQA-TDGH   | SLA-E | RVR | REK | -- | IS-ER-MKFLQ | CC-NKITG | CC-YKMG                          | KAV-ML-DEIHYVQSLQVQLLEQIQQNGGDP    |
| AtbHLH044  | REVVIHYVARRGQA-TDGH  | SLA-E | RVR | REK | -- | IN-ER-LKCLQ | D-MVP    | CC-YKMG                          | KAV-ML-DEIHYVQSLQVQLLEQIQQNGGDP    |
| PfblHLH065 | QDYIHYVARRGQA-TDGH   | SLA-E | RVR | REK | -- | IS-ER-MKFLQ | D-LVP    | CC-SKITG                         | KAV-ML-DEIHYVQSLQVQLLEQIQQNGGDP    |
| OsblHLH066 | EDYIHYVARRGQA-TDGH   | SLA-E | RVR | REK | -- | IS-ER-MKFLQ | D-LVP    | CC-SKITG                         | KAV-ML-DEIHYVQSLQVQLLEQIQQNGGDP    |
| AtbHLH075  | KDYIHYVARRGQA-TDGH   | SLA-E | RVR | REK | -- | IN-ER-LKCLQ | D-LVP    | CC-YKMG                          | KAV-ML-DEIHYVQSLQVQLLEQIQQNGGDP    |
| AtbHLH076  | DGYIHYVARRGQA-TDGH   | SLA-E | RVR | REK | -- | IS-ER-MKFLQ | D-LVP    | CC-DKVTG                         | KAV-ML-DEIHYVQSLQVQLLEQIQQNGGDP    |
| AtbHLH078  | KDYIHYVARRGQA-TDGH   | SLA-E | RVR | REK | -- | IS-ER-MKFLQ | D-LVP    | CC-NKITG                         | KAV-ML-DEIHYVQSLQVQLLEQIQQNGGDP    |
| AtbHLH031  | KDYIHYVARRGQA-TDGH   | SLA-E | RVR | REK | -- | IS-ER-MKFLQ | D-LVP    | CC-NKITG                         | KAV-ML-DEIHYVQSLQVQLLEQIQQNGGDP    |
| OsblHLH095 | KDYIHYVARRGQA-TDGH   | SLA-E | RVR | REK | -- | IS-ER-MKFLQ | D-LVP    | CC-NKITG                         | KAV-ML-DEIHYVQSLQVQLLEQIQQNGGDP    |
| AtbHLH079  | KDYIHYVARRGQA-TDGH   | SLA-E | RVR | REK | -- | IS-EK-MTFLQ | D-LIP    | CC-NKITG                         | KAV-ML-DEIHYVQSLQVQLLEQIQQNGGDP    |
| OsblHLH081 | KDYIHYVARRGQA-TDGH   | SLA-E | RVR | REK | -- | IS-ER-MKFLQ | D-LVP    | CC-NKITG                         | KAV-ML-DEIHYVQSLQVQLLEQIQQNGGDP    |
| AtbHLH049  | DCYIHYVARRGQA-TDGH   | SLA-E | RVR | REK | -- | IS-ER-MKFLQ | D-LVP    | CC-NKITG                         | KAV-ML-DEIHYVQSLQVQLLEQIQQNGGDP    |
| AtbHLH050  | REVVIHYVARRGQA-TDGH  | SLA-E | RVR | REK | -- | IN-ER-LKCLQ | D-LVP    | CC-YKMG                          | KAV-ML-DEIHYVQSLQVQLLEQIQQNGGDP    |
| AtbHLH064  | LDYIHYVARRGQA-TDGH   | SLA-E | RVR | REK | -- | IS-KK-MKFLQ | D-LVP    | CC-NKITG                         | KAV-ML-DEIHYVQSLQVQLLEQIQQNGGDP    |
| AtbHLH048  | LYVVIHYVARRGQA-TDGH  | SLA-E | RVR | REK | -- | IN-AR-MKFLQ | E-LVP    | CC-DKITG                         | TAL-VL-DEIHYVQSLQVQLLEQIQQNGGDP    |
| AtbHLH062  | KDYIHYVARRGQA-TDGH   | SLA-E | RVR | REK | -- | IS-ER-MKFLQ | D-LVP    | CC-NKITG                         | KAV-ML-DEIHYVQSLQVQLLEQIQQNGGDP    |
| OsblHLH079 | TDYIHYVARRGQA-TDGH   | SLA-E | RVR | REK | -- | IS-ER-MKFLQ | D-LVP    | CC-NKITG                         | KAV-ML-DEIHYVQSLQVQLLEQIQQNGGDP    |
| AtbHLH071  | KDYIHYVARRGQA-TDGH   | SLA-E | RVR | REK | -- | IS-ER-MKFLQ | D-LVP    | CC-NKITG                         | KAV-ML-DEIHYVQSLQVQLLEQIQQNGGDP    |
| AtbHLH060  | LYVVIHYVARRGQA-TDGH  | SLA-E | RVR | REK | -- | IN-AR-MKFLQ | E-LVP    | CC-DKITG                         | TAL-VL-DEIHYVQSLQVQLLEQIQQNGGDP    |
| AtbHLH137  | TDYIHYVARRGQA-TDGH   | SLA-E | RVR | REK | -- | IS-ER-MKFLQ | N-LVP    | CC-DKITG                         | KAL-ML-DEIHYVQSLQVQLLEQIQQNGGDP    |
| OsblHLH080 | KDYIHYVARRGQA-TDGH   | SLA-E | RVR | REK | -- | IS-ER-MKFLQ | A-LVP    | CC-DKITG                         | KAL-ML-DEIHYVQSLQVQLLEQIQQNGGDP    |
| PfblHLH051 | QDYIHYVARRGQA-TDGH   | SLA-E | RVR | REK | -- | IS-ER-MKFLQ | D-LVP    | CC-SKITG                         | KAV-ML-DEIHYVQSLQVQLLEQIQQNGGDP    |
| AtbHLH063  | TDYIHYVARRGQA-TDGH   | SLA-E | RVR | REK | -- | IS-ER-MKFLQ | D-LVP    | CC-DKITG                         | KAL-ML-DEIHYVQSLQVQLLEQIQQNGGDP    |
| AtbHLH059  | FDYIHYVARRGQA-TDGH   | SLA-E | RVR | REK | -- | IS-ER-MKFLQ | D-LVP    | CC-NKITG                         | KAV-ML-DEIHYVQSLQVQLLEQIQQNGGDP    |
| PfblHLH076 | QDYIHYVARRGQA-TDGH   | SLA-E | RVR | REK | -- | IS-ER-MKFLQ | D-LVP    | CC-NKITG                         | KAV-ML-DEIHYVQSLQVQLLEQIQQNGGDP    |
| OsblHLH084 | EDYIHYVARRGQA-TDGH   | SLA-E | RVR | REK | -- | IS-ER-MKFLQ | D-LVP    | CC-SKITG                         | KAV-ML-DEIHYVQSLQVQLLEQIQQNGGDP    |
| OsblHLH094 | QDYIHYVARRGQA-TDGH   | SLA-E | RVR | REK | -- | IS-ER-MKFLQ | D-LVP    | CC-NKITG                         | KAV-ML-DEIHYVQSLQVQLLEQIQQNGGDP    |
| PfblHLH073 | QDYIHYVARRGQA-TDGH   | SLA-E | RVR | REK | -- | IS-ER-MKFLQ | D-LVP    | CC-SKITG                         | KAV-ML-DEIHYVQSLQVQLLEQIQQNGGDP    |
| OsblHLH090 | KDYIHYVARRGQA-TDGH   | SLA-E | RVR | REK | -- | IS-OR-MKFLQ | D-LVP    | CC-NKITG                         | KAV-ML-DEIHYVQSLQVQLLEQIQQNGGDP    |
| PfblHLH007 | QDYIHYVARRGQA-TDGH   | SLA-E | RVR | REK | -- | IS-NR-MKFLQ | A-LVP    | CC-SKITG                         | KAV-ML-DEIHYVQSLQVQLLEQIQQNGGDP    |
| PfblHLH077 | QDYIHYVARRGQA-TDGH   | SLA-E | RVR | REK | -- | IS-OR-MKFLQ | D-LVP    | CC-NKITG                         | KAV-ML-DEIHYVQSLQVQLLEQIQQNGGDP    |
| OsblHLH091 | KDYIHYVARRGQA-TDGH   | SLA-E | RVR | REK | -- | IS-OR-MKFLQ | D-LVP    | CC-NKITG                         | KAV-ML-DEIHYVQSLQVQLLEQIQQNGGDP    |
| OsblHLH085 | EDYIHYVARRGQA-TDGH   | SLA-E | RVR | REK | -- | IS-ER-MKFLQ | D-LVP    | CC-SKITG                         | KAV-ML-DEIHYVQSLQVQLLEQIQQNGGDP    |
| OsblHLH088 | EDYIHYVARRGQA-TDGH   | SLA-E | RVR | REK | -- | IN-ER-MKFLQ | D-LVP    | CC-NKITG                         | KAV-ML-DEIHYVQSLQVQLLEQIQQNGGDP    |
| OsblHLH089 | QDYIHYVARRGQA-TDGH   | SLA-E | RVR | REK | -- | IS-ER-MKFLQ | D-LVP    | CC-NKITG                         | KAV-ML-DEIHYVQSLQVQLLEQIQQNGGDP    |
| PfblHLH070 | QDYIHYVARRGQA-TDGH   | SLA-E | RVR | REK | -- | IS-ER-MKFLQ | D-LVP    | CC-SKITG                         | KAV-ML-DEIHYVQSLQVQLLEQIQQNGGDP    |
| PfblHLH072 | QDYIHYVARRGQA-TDGH   | SLA-E | RVR | REK | -- | IS-ER-MKFLQ | D-LVP    | CC-NKITG                         | KAV-ML-DEIHYVQSLQVQLLEQIQQNGGDP    |
| PfblHLH074 | QDYIHYVARRGQA-TDGH   | SLA-E | RVR | REK | -- | IS-ER-MKFLQ | D-LVP    | CC-NKITG                         | KAV-ML-DEIHYVQSLQVQLLEQIQQNGGDP    |
| OsblHLH081 | QDYIHYVARRGQA-TDGH   | SLA-E | RVR | REK | -- | IS-ER-MKFLQ | A-LVP    | CC-DKITG                         | KAL-ML-DEIHYVQSLQVQLLEQIQQNGGDP    |
| PfblHLH088 | QDYIHYVARRGQA-TDGH   | SLA-E | RVR | REK | -- | IS-NR-MKFLQ | A-LVP    | CC-SKITG                         | KAV-ML-DEIHYVQSLQVQLLEQIQQNGGDP    |
| OsblHLH083 | AGYIHYVARRGQA-TDGH   | SLA-E | RVR | REK | -- | IS-ER-MKFLQ | S-LVP    | CC-DKITG                         | KAL-ML-DEIHYVQSLQVQLLEQIQQNGGDP    |
| PfblHLH001 | QDYIHYVARRGQA-TDGH   | SLA-E | RVR | REK | -- | IS-ER-MKFLQ | D-LVP    | CC-SKITG                         | KAV-ML-DEIHYVQSLQVQLLEQIQQNGGDP    |
| OsblHLH092 | KDYIHYVARRGQA-TDGH   | SLA-E | RVR | REK | -- | IS-OR-MKFLQ | D-LVP    | CC-NKITG                         | KAV-ML-DEIHYVQSLQVQLLEQIQQNGGDP    |
| PfblHLH068 | QDYIHYVARRGQA-TDGH   | SLA-E | RVR | REK | -- | IS-ER-MKFLQ | D-LVP    | CC-NKITG                         | KAV-ML-DEIHYVQSLQVQLLEQIQQNGGDP    |
| PfblHLH017 | QDYIHYVARRGQA-TDGH   | SLA-E | RVR | REK | -- | IS-ER-MKFLQ | D-LVP    | CC-NKITG                         | KAV-ML-DEIHYVQSLQVQLLEQIQQNGGDP    |
| OsblHLH093 | KDYIHYVARRGQA-TDGH   | SLA-E | RVR | REK | -- | IS-ER-MKFLQ | D-LVP    | CC-NKITG                         | KAV-ML-DEIHYVQSLQVQLLEQIQQNGGDP    |
| SmbHLH010  | QDYIHYVARRGQA-TDGH   | SLA-E | RVR | REK | -- | IS-ER-MKFLQ | D-LVP    | CC-SKITG                         | KAV-ML-DEIHYVQSLQVQLLEQIQQNGGDP    |
| SmbHLH023  | QDYIHYVARRGQA-TDGH   | SLA-E | RVR | REK | -- | IS-ER-MKFLQ | D-LVP    | CC-SKITG                         | KAV-ML-DEIHYVQSLQVQLLEQIQQNGGDP    |
| SmbHLH028  | KDYIHYVARRGQA-TDGH   | SLA-E | RVR | REK | -- | IS-ER-MKFLQ | D-LVP    | CC-NKITG                         | KAV-ML-DEIHYVQSLQVQLLEQIQQNGGDP    |
| SmbHLH039  | QDYIHYVARRGQA-TDGH   | SLA-E | RVR | REK | -- | IS-ER-MKFLQ | D-LVP    | CC-SKITG                         | KAV-ML-DEIHYVQSLQVQLLEQIQQNGGDP    |
| SmbHLH045  | QDYIHYVARRGQA-TDGH   | SLA-E | RVR | REK | -- | IS-ER-MKFLQ | D-LVP    | CC-SKITG                         | KAV-ML-DEIHYVQSLQVQLLEQIQQNGGDP    |
| SmbHLH093  | KDYIHYVARRGQA-TDGH   | SLA-E | RVR | REK | -- | IS-ER-MKFLQ | D-LVP    | CC-NKITG                         | KAV-ML-DEIHYVQSLQVQLLEQIQQNGGDP    |
| OsblHLH139 | KGSSPDSTCSSS-VGGG    | QAR-P | GRK | KER | -- | MM-KM-VRTLK | GG-IP-MD | GG-NQ-MD                         | TFA-VL-DEAVRVLKELKQVVKLGVKSGDND    |
| AtbHLH148  | VSSSSNRSRK-R-RVSV    | LRL-N | KKS | IPD | -- | VM-KR-VRVLQ | R-LVP    | GG-GR-QS                         | VFV-VL-DEATDYQLKELKQVVKLGVKSGDND   |
| AtbHLH145  | CGSDNTRISF-L-KRKK    | LSS-N | KIG | EKK | -- | IF-ET-VSLTR | S-MVP    | GG-EL-VD                         | PIL-VL-DEAVRVLKELKQVVKLGVKSGDND    |
| AtbHLH144  | NNNSNRKQ-SLSS-GASS   | SNN-D | GKC | RKK | -- | MM-KM-MVTRK | C-LIP    | GG-GR-MD                         | TFC-VL-DEAVRVLKELKQVVKLGVKSGDND    |
| OsblHLH150 | CGSSRSDCGGR-RRR      | RER-E | RKR | RER | -- | MM-KM-MVTRK | S-LVP    | GG-DR-MD                         | TFC-VL-DEAVRVLKELKQVVKLGVKSGDND    |
| SmbHLH024  | SYNSNRKQ-RSLV-VRRR   | KEM-K | KOR | KER | -- | IR-TQ-VKALQ | S-MVP    | GG-DS-MD                         | PAT-VL-DEAILYKQVVKLGVKSGDND        |
| SmbHLH029  | SYNSNRKQ-RSLV-VRRR   | KEM-K | KOR | KER | -- | IR-TQ-VKALQ | S-MVP    | GG-DS-MD                         | PAT-VL-DEAILYKQVVKLGVKSGDND        |
| SmbHLH054  | GRSSRSDCGRLS-VRST    | RSS-K | KSR | ROT | -- | IK-YK-IQVLR | N-LIP    | GG-AG-ME                         | AAS-VL-DEIRYVTSLESMILQFKAMKSGPRP   |
| SmbHLH079  | GRSSRSDCGRLS-VRST    | RSS-K | KSR | ROT | -- | IK-YK-IQVLR | N-LIP    | GG-AG-ME                         | AAS-VL-DEIRYVTSLESMILQFKAMKSGPRP   |
| AtbHLH147  | TLLTGSIRSKKQ-RATV    | LRL-K | AKG | LPA | -- | VQ-RK-VRVLQ | GG-RR-QS | GG-RKQS                          | LPV-VL-DEITDYAEMEMQIRMTALSASSSS    |

SmbHLH022 SRCQGLRKRIMQ-SQQQ---RRS-S---RDD-EQT---IQ--SR-VKALQ---G-LVP-----GSV-LL-GEAADYMMFLRFQFPAAGYFRTRAKR  
OsbHLH134 GNGKVFARRRRA-TIAQ---SLV-A---RRR-RER---IN-GR-LRILQ---K-LVP-----NG-TK-VD-----1ST-M-EEAVHYVFKLQIKVEVQVCHDQML  
OsbHLH130 TSKGSRARAGAA-TDPO---SLV-A---RRR-RER---IN-GR-LRILQ---N-LVP-----NG-TK-VD-----1ST-M-EEAVHYVFKLQIKVEVQVCHDQML  
OsbHLH129 HGGAKARRAGAA-TDPO---SLV-A---RRR-RER---IN-GR-LRILQ---N-LVP-----NG-TK-VD-----1ST-M-EEAVHYVFKLQIKVEVQVCHDQML  
AtbHLH084 SLKRRKANRGA-TDPO---SLV-A---RRR-RER---IN-GR-LRILQ---S-LVP-----NG-TK-VD-----1ST-M-EEAVHYVFKLQIKVEVQVCHDQML  
AtbHLH139 NTLNFKPRAGGA-TDPO---SLV-A---RRR-RER---IN-GR-LRILQ---S-LVP-----NG-TK-VD-----1ST-M-EEAVHYVFKLQIKVEVQVCHDQML  
PpbHLH034 PAFKORRRHGA-TDPO---SIA-A---RTR-REK---FT-DR-IRILQ---S-LVP-----NG-ER-LD-----1TV-M-SQTFEYVRFQHKWLDVNNKDSISEV  
PpbHLH050 PAFKORRRHGA-TDPO---SIA-A---RTR-REK---FT-DR-IRILQ---G-LVP-----NG-ER-LD-----1TV-M-SQTFEYVRFQHKWLDVNNKDSISEV  
OsbHLH131 KSNCAQSGHRSR-TDPO---SLV-A---RRR-RER---IN-GR-LRILQ---N-LVP-----NG-TK-VD-----1ST-M-EEAVHYVFKLQIKVEVQVCHDQML  
AtbHLH086 TNGIKPKRATTS-RDPO---SLV-A---RIR-REK---IS-ER-LKVLQ---E-LVP-----NG-TK-VD-----1ST-M-EEAVHYVFKLQIKVEVQVCHDQML  
AtbHLH083 VTKRKPFRATTS-RDPO---SLV-A---RIR-REK---IS-ER-LKVLQ---E-LVP-----NG-TK-VD-----1ST-M-EEAVHYVFKLQIKVEVQVCHDQML  
OsbHLH127 ELKRRKRRRGA-TDPO---SLV-A---RRR-RER---IN-GR-LRILQ---E-LVP-----NG-TK-VD-----1ST-M-EEAVHYVFKLQIKVEVQVCHDQML  
AtbHLH054 SVKCKRATKGA-TDPO---SLV-A---RRR-RER---IN-GR-LRILQ---E-LVP-----NG-TK-VD-----1ST-M-EEAVHYVFKLQIKVEVQVCHDQML  
PpbHLH043 NTLNFKPRAGGA-TDPO---SIA-A---RVR-REK---IS-ER-LKVLQ---A-LIP-----NG-DK-VD-----1MT-M-EKAIHYVFKLEFQIKMLKNSLWPKAL  
PpbHLH063 NTLNFKPRAGGA-TDPO---SVV-A---RIR-REK---IS-ER-LKVLQ---G-LVP-----NG-EQ-VD-----1VT-M-EEAVHYVFKLEFQIKMLKNSLWPKAL  
PpbHLH095 NTLNFKPRAGGA-TDPO---SVV-A---RIR-REK---IS-ER-LKVLQ---N-LVP-----NG-AK-VD-----1VT-M-DEAIHYVFKLQVLELLKSDPWFAN  
OsbHLH126 KAGAKASAPTTT-RDPO---SLV-A---RIR-REK---IS-ER-LKVLQ---E-LVP-----NG-TK-VD-----1ST-M-EEAVHYVFKLQIKVEVQVCHDQML  
OsbHLH132 KGSIDRRKQCS-RDPO---SLV-A---RIR-REK---IS-ER-LKVLQ---Q-LVP-----NG-TK-VD-----1ST-M-EEAVHYVFKLQIKVEVQVCHDQML  
AtbHLH084 NTLNFKPRAGGA-TDPO---SLV-A---RRR-RER---IN-GR-LRILQ---E-LVP-----NG-TK-VD-----1ST-M-EEAVHYVFKLQIKVEVQVCHDQML  
OsbHLH128 SKMCRANRGA-TDPO---SLV-A---RRR-RER---IN-GR-LRILQ---N-LVP-----NG-TK-VD-----1ST-M-EEAVHYVFKLQIKVEVQVCHDQML  
PpbHLH083 NTLNFKPRAGGA-TDPO---SVH-A---RVR-REK---IA-ER-LKVLQ---H-LIP-----NG-GK-VD-----1VT-M-DEAVHYVFKLQIKVEVQVCHDQML  
OsbHLH125 PPSPPSPSPSPNK-DQPO---SAA-A---RVR-REK---IS-ER-LKVLQ---D-LVP-----NG-TK-VD-----1VT-M-EKAIHYVFKLQIKVEVQVCHDQML  
PpbHLH028 NTLNFKPRAGGA-TDPO---SVV-A---RIR-REK---IN-GR-LRILQ---H-LIP-----NG-AK-VD-----1VT-M-DEAIHYVFKLQIKVEVQVCHDQML  
OsbHLH133 MVSVKCKRSVSA-ESQO---SVV-A---RIR-REK---IN-GR-LRILQ---E-LVP-----NG-TK-VD-----1ST-M-EEAVHYVFKLQIKVEVQVCHDQML  
PpbHLH027 NTLNFKPRAGGA-TDPO---SIA-A---RIR-REK---IS-ER-LKVLQ---E-LVP-----NG-TK-VD-----1ST-M-EEAVHYVFKLQIKVEVQVCHDQML  
SmbHLH003 NTLNFKPRAGGA-TDPO---SIA-A---RIR-REK---IS-DR-LKVLQ---E-LVP-----NS-TK-VD-----1VT-M-EKAIHYVFKLQIKVEVQVCHDQML  
SmbHLH004 NTLNFKPRAGGA-TDPO---SIA-A---RIR-REK---IS-DR-LKVLQ---E-LVP-----NS-TK-VD-----1VT-M-EKAIHYVFKLQIKVEVQVCHDQML  
SmbHLH005 NTLNFKPRAGGA-TDPO---SIA-A---RIR-REK---IS-DR-LKVLQ---E-LIP-----NG-SK-VD-----1VT-M-EKAIHYVFKLQIKVEVQVCHDQML  
SmbHLH006 NTLNFKPRAGGA-TDPO---SIA-A---RIR-REK---IS-DR-LKVLQ---E-LIP-----NG-SK-VD-----1VT-M-EKAIHYVFKLQIKVEVQVCHDQML  
SmbHLH018 NTLNFKPRAGGA-TDPO---SVV-A---RIR-REK---IN-GR-LRILQ---H-LIP-----NG-AK-VD-----1VT-M-EEAVHYVFKLQIKVEVQVCHDQML  
SmbHLH042 NTLNFKPRAGGA-TDPO---SIA-A---RIR-REK---IN-GR-LRILQ---E-LVP-----NG-TK-VD-----1ST-M-EEAVHYVFKLQIKVEVQVCHDQML  
SmbHLH019 NTLNFKPRAGGA-TDPO---SIA-A---RIR-REK---IN-GR-LRILQ---E-LVP-----NG-TK-VD-----1ST-M-EEAVHYVFKLQIKVEVQVCHDQML  
SmbHLH103 NTLNFKPRAGGA-TDPO---SIA-A---RIR-REK---IS-DR-LKVLQ---D-LVP-----NG-SK-VD-----1VT-M-EKAIHYVFKLQIKVEVQVCHDQML  
AtbHLH066 QSRTKRARRGA-TDPO---SIA-E---RIR-REK---IA-ER-MKALQ---E-LVP-----KAS-M-DEIHYVFKLQIKVEVQVCHDQML  
OsbHLH097 APKPRVARRGA-TDPO---SIA-E---RIR-REK---IS-DR-MKALQ---E-LVP-----NS-NK-TD-----KAS-M-DEIHYVFKLQIKVEVQVCHDQML  
AtbHLH059 SIRPRVARRGA-TDPO---SIA-E---RIR-REK---IA-ER-IRALQ---E-LVP-----RAA-M-DEIHYVFKLQIKVEVQVCHDQML  
AtbHLH069 QPKPRVARRGA-TDPO---SIA-E---RIR-REK---IA-ER-MKALQ---E-LVP-----NS-NK-TD-----KAS-M-DEIHYVFKLQIKVEVQVCHDQML  
OsbHLH096 NAKPRVARRGA-TDPO---SIA-E---RIR-REK---IS-DR-MKALQ---E-LVP-----NS-NK-TD-----KAS-M-DEIHYVFKLQIKVEVQVCHDQML  
PpbHLH012 GARPVARRGA-TDPO---SIA-E---RIR-REK---IA-ER-MKALQ---E-LVP-----NS-NK-TD-----KAS-M-DEIHYVFKLQIKVEVQVCHDQML  
OsbHLH100 PRQPRVARRGA-TDPO---SIA-E---RIR-REK---IA-ER-MKALQ---E-LVP-----NA-NK-LMOTD-----KAS-M-DEIHYVFKLQIKVEVQVCHDQML  
OsbHLH098 APRPRVARRGA-TDPO---SIA-E---RIR-REK---IA-ER-MKALQ---E-LVP-----NT-NK-TD-----RAA-M-DEIHYVFKLQIKVEVQVCHDQML  
PpbHLH013 GARPVARRGA-TDPO---SIA-E---RIR-REK---IA-ER-MKALQ---E-LVP-----NS-NK-TD-----KAS-M-DEIHYVFKLQIKVEVQVCHDQML  
OsbHLH114 VHSPTTTPSPSP-FFIA---SMP-C---CLR-REK---IA-ER-MKALQ---E-LVP-----NA-NK-TD-----KAS-M-DEIHYVFKLQIKVEVQVCHDQML  
OsbHLH112 VYARRRGA-TDPO---SIA-E---RIR-REK---IA-ER-MKALQ---E-LVP-----NA-NK-TD-----KAS-M-DEIHYVFKLQIKVEVQVCHDQML  
SmbHLH002 VYARRRGA-TDPO---SIA-E---RIR-REK---IA-ER-MKALQ---E-LVP-----NA-NK-TD-----KAS-M-DEIHYVFKLQIKVEVQVCHDQML  
SmbHLH057 AARPRVARRGA-TDPO---SIA-E---RIR-REK---IA-ER-MKALQ---E-LVP-----NS-NK-TD-----KAS-M-DEIHYVFKLQIKVEVQVCHDQML  
SmbHLH058 RFRVARRRGA-TDPO---SIA-E---RIR-REK---IA-ER-MKALQ---D-LVP-----NA-NK-TD-----KAS-M-DEIHYVFKLQIKVEVQVCHDQML  
SmbHLH068 AARPRVARRGA-TDPO---SIA-E---RIR-REK---IA-ER-MKALQ---E-LVP-----NS-NK-TD-----KAS-M-DEIHYVFKLQIKVEVQVCHDQML  
SmbHLH076 SARPRVARRGA-TDPO---SIA-E---RIR-REK---IA-ER-MKALQ---E-LVP-----NA-NK-TD-----KAS-M-DEIHYVFKLQIKVEVQVCHDQML  
SmbHLH085 RFRVARRRGA-TDPO---SIA-E---RIR-REK---IA-ER-MKALQ---D-LVP-----NA-NK-TD-----KAS-M-DEIHYVFKLQIKVEVQVCHDQML  
OsbHLH099 TIRPRVARRGA-TDPO---SIA-E---RIR-REK---IA-ER-IRALQ---E-LVP-----RAA-M-DEIHYVFKLQIKVEVQVCHDQML  
AtbHLH007 TIRPRVARRGA-TDPO---SIA-E---RIR-REK---IA-ER-IRALQ---E-LVP-----RAA-M-DEIHYVFKLQIKVEVQVCHDQML  
PpbHLH015 MRARAKRGA-TDPO---SIA-E---RIR-REK---IA-ER-IRALQ---D-LVP-----NM-EKTNT-----TSD-M-DEIHYVFKLQIKVEVQVCHDQML  
AtbHLH080 SVPCRRARRGA-TDPO---SIA-E---RIR-REK---IS-DR-IRLQ---E-LVP-----NM-DKQTN-----TAD-M-DEIHYVFKLQIKVEVQVCHDQML  
OsbHLH111 QVPRVARRGA-TDPO---SIA-E---RIR-REK---IS-DR-IRLQ---A-LVP-----NM-DKQTS-----TSD-M-DEIHYVFKLQIKVEVQVCHDQML  
OsbHLH110 QVPRVARRGA-TDPO---SIA-E---RIR-REK---IS-DR-IRLQ---E-LVP-----NM-DKQTS-----TAD-M-DEIHYVFKLQIKVEVQVCHDQML  
OsbHLH124 VYARRRGA-TDPO---SIA-E---RIR-REK---IA-ER-MKALQ---E-LVP-----NA-NK-TD-----KAS-M-DEIHYVFKLQIKVEVQVCHDQML  
OsbHLH109 SVACRRARRGA-TDPO---SIA-E---RIR-REK---IS-DR-IRLQ---D-LVP-----NM-DKQTN-----TSD-M-DEIHYVFKLQIKVEVQVCHDQML  
PpbHLH006 YSPCKRARRGA-TDPO---SIA-E---RIR-REK---IS-DR-IRLQ---E-LVP-----NM-DKQTN-----TAD-M-DEIHYVFKLQIKVEVQVCHDQML  
AtbHLH081 SVAFRRARRGA-TDPO---SIA-E---RIR-REK---IS-DR-IRLQ---E-LVP-----NM-DKQTN-----TAD-M-DEIHYVFKLQIKVEVQVCHDQML  
AtbHLH130 SVPCRRARRGA-TDPO---SIA-E---RIR-REK---IS-DR-IRLQ---E-LVP-----NM-DKQTN-----TAD-M-DEIHYVFKLQIKVEVQVCHDQML  
PpbHLH094 VYLRTRARRGA-TDPO---SIA-E---RIR-REK---IS-DR-IRLQ---E-LVP-----NS-DKQTN-----TAD-M-DEIHYVFKLQIKVEVQVCHDQML  
AtbHLH128 SVPCRRARRGA-TDPO---SIA-E---RIR-REK---IS-DR-IRLQ---E-LVP-----NM-DKQTS-----TAD-M-DEIHYVFKLQIKVEVQVCHDQML  
AtbHLH124 VYARRRGA-TDPO---SIA-E---RIR-REK---IA-ER-MKALQ---E-LVP-----NA-NK-TD-----KAS-M-DEIHYVFKLQIKVEVQVCHDQML  
PpbHLH075 VQBARAKRGA-TDPO---SIA-E---RIR-REK---IS-DR-IRLQ---D-LVP-----NM-EKTNT-----TAD-M-DEIHYVFKLQIKVEVQVCHDQML  
PpbHLH047 TVVMTRARRGA-TDPO---SIA-E---RIR-REK---IS-DR-IRLQ---E-LVP-----SM-DKQTN-----TSD-M-DEIHYVFKLQIKVEVQVCHDQML  
AtbHLH122 SIPCKRARRGA-TDPO---SIA-E---RIR-REK---IS-DR-IRLQ---D-LVP-----NM-DKQTN-----TAD-M-DEIHYVFKLQIKVEVQVCHDQML  
PpbHLH016 VYLRTRARRGA-TDPO---SIA-E---RIR-REK---IS-DR-IRLQ---E-LVP-----SM-DKQTN-----TAD-M-DEIHYVFKLQIKVEVQVCHDQML  
OsbHLH143 AVPCRRARRGA-TDPO---SIA-E---RIR-REK---IS-DR-IRLQ---E-LVP-----NM-EKTNT-----TAD-M-DEIHYVFKLQIKVEVQVCHDQML  
PpbHLH008 AVPCRRARRGA-TDPO---SIA-E---RIR-REK---IS-DR-IRLQ---D-LVP-----NM-DKQTN-----TSD-M-DEIHYVFKLQIKVEVQVCHDQML  
SmbHLH009 VYARRRGA-TDPO---SIA-E---RIR-REK---IA-ER-MKALQ---E-LVP-----NA-NK-TD-----KAS-M-DEIHYVFKLQIKVEVQVCHDQML  
SmbHLH033 SVPCRRARRGA-TDPO---SIA-E---RIR-REK---IS-DR-IRLQ---D-LVP-----NM-DKQTN-----TAD-M-DEIHYVFKLQIKVEVQVCHDQML  
SmbHLH059 SVPCRRARRGA-TDPO---SIA-E---RIR-REK---IS-DR-IRLQ---E-LVP-----NM-DKQTN-----TAD-M-DEIHYVFKLQIKVEVQVCHDQML  
SmbHLH091 SVPCRRARRGA-TDPO---SIA-E---RIR-REK---IS-DR-IRLQ---D-LVP-----NM-DKQTN-----TAD-M-DEIHYVFKLQIKVEVQVCHDQML  
OsbHLH175 MS-RR-SRRA---SIA-A---RIR-REK---IS-DR-IRLQ---A-LIP-----E-ARLRN-DR-VF---SAR-VL-ETCSYIRSLREVDLSEKALLEAA  
AtbHLH134 MSRRSR-SRQA---SIS-S---RIS-EDQ---IN-DR-IRLQ---Q-LIP-----E-ARLRN-DR-VF---SAR-VL-ETCSYIRSLREVDLSEKALLEAA  
OsbHLH174 MSRRSR-SRQA---SIS-S---RIS-EDQ---IN-DR-IRLQ---Q-LIP-----E-ARLRN-DR-VF---SAR-VL-ETCSYIRSLREVDLSEKALLEAA  
AtbHLH173 MSRRSR-SRQA---SIS-S---RIS-EDQ---IN-DR-IRLQ---Q-LIP-----E-ARLRN-DR-VF---SAR-VL-ETCSYIRSLREVDLSEKALLEAA  
AtbHLH161 MSRRSR-SRQA---SIS-S---RIS-EDQ---IN-DR-IRLQ---Q-LIP-----E-ARLRN-DR-VF---SAR-VL-ETCSYIRSLREVDLSEKALLEAA  
AtbHLH155 MSRRSR-SRQA---SIS-S---RIS-EDQ---IN-DR-IRLQ---Q-LIP-----E-ARLRN-DR-VF---SAR-VL-ETCSYIRSLREVDLSEKALLEAA  
OsbHLH154 MSRRSR-SRQA---SIS-S---RIS-EDQ---IN-DR-IRLQ---Q-LIP-----E-ARLRN-DR-VF---SAR-VL-ETCSYIRSLREVDLSEKALLEAA  
AtbHLH136 NRKPKKRNQO-KSS---VCI-A---RIR-REK---IS-DR-IRLQ---Q-LIP-----E-ARLRN-DR-VF---SAR-VL-ETCSYIRSLREVDLSEKALLEAA  
OsbHLH069 LQAMQPKPS-CS-NAN---TLL-A---KVR-REK---IS-DR-IRLQ---Q-LIP-----E-ARLRN-DR-VF---SAR-VL-ETCSYIRSLREVDLSEKALLEAA  
SmbHLH013 EM---EMO-M---CVR-REK---IS-DR-IRLQ---Q-LIP-----E-ARLRN-DR-VF---SAR-VL-ETCSYIRSLREVDLSEKALLEAA  
SmbHLH014 EM---EMO-M---CVR-REK---IS-DR-IRLQ---Q-LIP-----E-ARLRN-DR-VF---SAR-VL-ETCSYIRSLREVDLSEKALLEAA  
SmbHLH064 EM---EMO-M---CVR-REK---IS-DR-IRLQ---Q-LIP-----E-ARLRN-DR-VF---SAR-VL-ETCSYIRSLREVDLSEKALLEAA  
SmbHLH067 EM---EMO-M---CVR-REK---IS-DR-IRLQ---Q-LIP-----E-ARLRN-DR-VF---SAR-VL-ETCSYIRSLREVDLSEKALLEAA  
OsbHLH074 ATGSAKKR-VO-ASSA---QST-L---KVR-REK---IS-DR-IRLQ---Q-LIP-----E-ARLRN-DR-VF---SAR-VL-ETCSYIRSLREVDLSEKALLEAA  
OsbHLH073 ATGSAKKR-VO-ASSA---QST-L---KVR-REK---IS-DR-IRLQ---Q-LIP-----E-ARLRN-DR-VF---SAR-VL-ETCSYIRSLREVDLSEKALLEAA  
OsbHLH075 RGGKAKKFK-SE-T-SHST---SPK-H---QSP-KVR---LG-DR-IRLQ---Q-LIP-----E-ARLRN-DR-VF---SAR-VL-ETCSYIRSLREVDLSEKALLEAA  
OsbHLH077 GSDGKPKK-HE-ATS-PTS---SLR-S---QVP-KVR---LG-DR-IRLQ---Q-LIP-----E-ARLRN-DR-VF---SAR-VL-ETCSYIRSLREVDLSEKALLEAA  
OsbHLH071 ALPPSKPKR-LE-SHSSM---LPS-F---KVR-REK---IS-DR-IRLQ---Q-LIP-----E-ARLRN-DR-VF---SAR-VL-ETCSYIRSLREVDLSEKALLEAA  
AtbHLH153 LGBSSKPKR-SD---L---SFS-S---KVR-REK---IS-DR-IRLQ---Q-LIP-----E-ARLRN-DR-VF---SAR-VL-ETCSYIRSLREVDLSEKALLEAA  
OsbHLH065 TFSKPKR-LE-SD---L---SFS-S---KVR-REK---IS-DR-IRLQ---Q-LIP-----E-ARLRN-DR-VF---SAR-VL-ETCSYIRSLREVDLSEKALLEAA  
OsbHLH070 LIPNLGMVIL-D-FL---PIK-F---KVR-REK---IS-DR-IRLQ---Q-LIP-----E-ARLRN-DR-VF---SAR-VL-ETCSYIRSLREVDLSEKALLEAA  
AtbHLH076 RQESTYKSK-GE-ASK---ASPP-KQV-FKVK---LG-DR-IRLQ---Q-LIP-----E-ARLRN-DR-VF---SAR-VL-ETCSYIRSLREVDLSEKALLEAA  
AtbHLH123 DQPAKAKR-SE-AASP---SPA-F---K-R---KEK---LG-DR-IRLQ---Q-LIP-----E-ARLRN-DR-VF---SAR-VL-ETCSYIRSLREVDLSEKALLEAA  
AtbHLH114 YSPRLKPKR-LE-TLSP---LPS-F---KVR-REK---IS-DR-IRLQ---Q-LIP-----E-ARLRN-DR-VF---SAR-VL-ETCSYIRSLREVDLSEKALLEAA  
OsbHLH103 ESSQPKPKR-LE-TFPH---FPS-F---KVR-REK---IS-DR-IRLQ---Q-LIP-----E-ARLRN-DR-VF---SAR-VL-ETCSYIRSLREVDLSEKALLEAA  
OsbHLH068 KKEAFKPKR-LE-TFPH---LPT-F---KVR-REK---IS-DR-IRLQ---Q-LIP-----E-ARLRN-DR-VF---SAR-VL-ETCSYIRSLREVDLSEKALLEAA  
AtbHLH068 TGSKPKR-LE-TFPH---LPT-F---KVR-REK---IS-DR-IRLQ---Q-LIP-----E-ARLRN-DR-VF---SAR-VL-ETCSYIRSLREVDLSEKALLEAA  
AtbHLH110 AGNSAKR-VE-SRSS---CPP-F---KVR-REK---IS-DR-IRLQ---Q-LIP-----E-ARLRN-DR-VF---SAR-VL-ETCSYIRSLREVDLSEKALLEAA  
OsbHLH072 ASGAAPKARTQO-PSA---QAT-V---KVR-REK---IS-DR-IRLQ---Q-LIP-----E-ARLRN-DR-VF---SAR-VL-ETCSYIRSLREVDLSEKALLEAA  
OsbHLH078 HGVCKR-VO-ASSA---QST-L---KVR-REK---IS-DR-IRLQ---Q-LIP-----E-ARLRN-DR-VF---SAR-VL-ETCSYIRSLREVDLSEKALLEAA  
OsbHLH066 GCDORRATAPAA-ATT---NKR-F---KVR-REK---IS-DR-IRLQ---Q-LIP-----E-ARLRN-DR-VF---SAR-VL-ETCSYIRSLREVDLSEKALLEAA  
OsbHLH067 SPAAKR-VE-SRSS---CPP-F---KVR-REK---IS-DR-IRLQ---Q-LIP-----E-ARLRN-DR-VF---SAR-VL-ETCSYIRSLREVDLSEKALLEAA  
AtbHLH154 EDNKKR-VE-SRSS---CPP-F---KVR-REK---IS-DR-IRLQ---Q-LIP-----E-ARLRN-DR-VF---SAR-VL-ETCSYIRSLREVDLSEKALLEAA  
AtbHLH112 ATGSAKKR-VO-ASSA---QST-L---KVR-REK---IS-DR-IRLQ---Q-LIP-----E-ARLRN-DR-VF---SAR-VL-ETCSYIRSLREVDLSEKALLEAA  
SmbHLH027 MRSEKTPHRTQO-REH---TLL-E---ROR-REK---IS-DR-IRLQ---Q-LIP-----E-ARLRN-DR-VF---SAR-VL-ETCSYIRSLREVDLSEKALLEAA  
SmbHLH038 GSEKTPHRTQO-REH---TLL-E---ROR-REK---IS-DR-IRLQ---Q-LIP-----E-ARLRN-DR-VF---SAR-VL-ETCSYIRSLREVDLSEKALLEAA  
SmbHLH065 MRSEKTPHRTQO-REH---TLL-E---ROR-REK---IS-DR-IRLQ---Q-LIP-----E-ARLRN-DR-VF---SAR-VL-ETCSYIRSLREVDLSEKALLEAA  
SmbHLH080 GSEKTPHRTQO-REH---TLL-E---ROR-REK---IS-DR-IRLQ---Q-LIP-----E-ARLRN-DR-VF---SAR-VL-ETCSYIRSLREVDLSEKALLEAA  
PpbHLH060 YATERSPHRTQO-REH---TLL-E---ROR-REK---IS-DR-IRLQ---Q-LIP-----E-ARLRN-DR-VF---SAR-VL-ETCSYIRSLREVDLSEKALLEAA  
PpbHLH024 TFSKPKR-LE-SD---L---SFS-S---KVR-REK---IS-DR-IRLQ---Q-LIP-----E-ARLRN-DR-VF---SAR-VL-ETCSYIRSLREVDLSEKALLEAA  
PpbHLH038 GVSQVSR-VE-SD---L---SFS-S---KVR-REK---IS-DR-IRLQ---Q-LIP-----E-ARLRN-DR-VF---SAR-VL-ETCSYIRSLREVDLSEKALLEAA  
PpbHLH093 AEPKSR-VE-SD---L---SFS-S---KVR-REK---IS-DR-IRLQ---Q-LIP-----E-ARLRN-DR-VF---SAR-VL-ETCSYIRSLREVDLSEKALLEAA  
PpbHLH059 VELSKEAR-VE-SD---L---SFS-S---KVR-REK---IS-DR-IRLQ---Q-LIP-----E-ARLRN-DR-VF---SAR-VL-ETCSYIRSLREVDLSEKALLEAA  
PpbHLH061 KDQVVKR-VE-SD---L---SFS-S---KVR-REK---IS-DR-IRLQ---Q-LIP-----E-ARLRN-DR-VF---SAR-VL-ETCSYIRSLREVDLSEKALLEAA  
PpbHLH064 TMDVVKR-VE-SD---L---SFS-S---KVR-REK---IS-DR-IRLQ---Q-LIP-----E-ARLRN-DR-VF---SAR-VL-ETCSYIRSLREVDLSEKALLEAA  
PpbHLH036 NTRKTR-VE-SD---L---SFS-S---KVR-REK---IS-DR-IRLQ---Q-LIP-----E-ARLRN-DR-VF---SAR-VL-ETCSYIRSLREVDLSEKALLEAA  
PpbHLH052 TFSKPKR-LE-SD---L---SFS-S---KVR-REK---IS-DR-IRLQ---Q-LIP-----E-ARLRN-DR-VF---SAR-VL-ETCSYIRSLREVDLSEKALLEAA  
PpbHLH049 EKQVSKR-VE-SD---L---SFS-S---KVR-REK---IS-DR-IRLQ---Q-LIP-----E-ARLRN-DR-VF---SAR-VL-ETCSYIRSLREVDLSEKALLEAA  
PpbHLH040 GPKTSR-VE-SD---L---SFS-S---KVR-REK---IS-DR-IRLQ---Q-LIP-----E-ARLRN-DR-VF---SAR-VL-ETCSYIRSLREVDLSEKALLEAA  
PpbHLH090 ANIRKTR-VE-SD---L---SFS-S---KVR-REK---IS-DR-IRLQ---Q-LIP-----E-ARLRN-DR-VF---SAR-VL-ETCSYIRSLREVDLSEKALLEAA  
PpbHLH091 EORMSK-VE-SD---L---SFS-S---KVR-REK---IS-DR-IRLQ---Q-LIP-----E-ARLRN-DR-VF---SAR-VL-ETCSYIRSLREVDLSEKALLEAA  
OsbHLH055 MSH---MSH---RIR-REK---IS-DR-IRLQ---Q-LIP-----E-ARLRN-DR-VF---SAR-VL-ETCSYIRSLREVDLSEKALLEAA  
AtbHLH092 RSKKPKR-VE-SD---L---SFS-S---KVR-REK---IS-DR-IRLQ---Q-LIP-----E-ARLRN-DR-VF---SAR-VL-ETCSYIRSLREVDLSEKALLEAA  
AtbHLH098 RSKKPKR-VE-SD---L---SFS-S---KVR-REK---IS-DR-IRLQ---Q-LIP-----E-ARLRN-DR-VF---SAR-VL-ETCSYIRSLREVDLSEKALLEAA  
AtbHLH096 RSKKPKR-VE-SD---L---SFS-S---KVR-REK---IS-DR-IRLQ---Q-LIP-----E-ARLRN-DR-VF---SAR-VL-ETCSYIRSLREVDLSEKALLEAA  
OsbHLH046 RSKKPKR-VE-SD---L---SFS-S---KVR-REK---IS-DR-IRLQ---Q-LIP-----E-ARLRN-DR-VF---SAR-VL-ETCSYIRSLREVDLSEKALLEAA  
OsbHLH045 RSKKPKR-VE-SD---L---SFS-S---KVR-REK---IS-DR-IRLQ---Q-LIP-----E-ARLRN-DR-VF---SAR-VL-ETCSYIRSLREVDLSEKALLEAA  
AtbHLH067 RSKKPKR-VE-SD---L---SFS-S---KVR-REK---IS-DR-IRLQ---Q-LIP-----E-ARLRN-DR-VF---SAR-VL-ETCSYIRSLREVDLSEKALLEAA  
AtbHLH070 RSKKPKR-VE-SD---L---SFS-S---KVR-REK---IS-DR-IRLQ---Q-LIP-----E-ARLRN-DR-VF---SAR-VL-ETCSYIRSLREVDLSEKALLEAA  
OsbHLH053 LAAVGDDGAA-RMSH---TVV-E---ROR-REK---IS-DR-IRLQ---Q-LIP-----E-ARLRN-DR-VF---SAR-VL-ETCSYIRSLREVDLSEKALLEAA





```

Hs_Emc      SVAISRCAGGAGA-RLPA-----LLD-E-----QQVNVLLYD---MN--GC--YSRLK-----E-LVP-----TLP-----QN-RK-VS-----KVE-IL-QHVYDIYIRDLQLELNSESEVGTTPGGRG
Hs_H/E      TTPDKPKTASEHR-KSSK-----PIM-E-----KRR--RAR---IN--ES--LSQLK-----T-LIL-----DALKKDS--RH-SK-LE-----KAD-IL-EMTVKHLRNLQRAQMTAALSTDPVSLG
Hs_Max      DEEQPRFQSAADR-KAHH-----NAL-E-----KRR--RDH---IK--DS--FHSRLK-----D-SVP-----SL-----QC-EK-AS-----RAQ-IL-DMATEYIQVMRRKNHTHQDIDDLKRG
Hs_MyoD     CRVCKRRKVSVDNR-RRAA-----TLR-E-----KRR--LKK---VN--EA--FEALK-----R-SVL-----LN-----PN-QR-LP-----KVE-IL-RSAIQYIERLQALLSLNQEBERDLRYR
Sc_INO4     RSKRIKIKLTDGQI-RIHG-----VSS-E-----KRR--REL---ER--AI--FOELV-----A-WVF-----DLQ-----PQ-ES-RS-----ELI-TY-LKSLYLKSLYERNEKLGKILAKIEA
Sc_RTG1     -MSSIPAGTDPCS-QCAN-----FKH-D-----BKR--BDK---IN--DR--IQEEL-----S-IIP-----KDFFRDYVYQNSGSDTLSESTPPALGLSSKAKGTCT--KD-CK-FN-----KCG-IL-TOAVEYISHLQNVQDQNRREVEBLMWK
Sc_RTG3     LGGLTSDKLRKK-RFHH-----NAV-E-----RRR--REL---IK--CK--IKELG-----Q-LVP-----PGLLNVDLGL-----KQ-IK-FN-----KGI-IL-DRIVEYIQVLAETILEIQARKKALLAK
Sc_HMS1     HVKPKRITVRVTG-RVSH-----NII-E-----KKY--RSN---IN--DK--IEQLR-----R-TVP-----TLRVAYKKCNLPIISRDLADLDGLG--PA-TK-LN-----KAS-IL-TKSYEYIQLERKCLQLSLANQLND
Sc_CBF1     TTLATTDEWKKQR-KDSH-----KEV-E-----RRR--REN---IN--TA--INVLS-----D-LLP-----V-RE-SS-----KAA-IL-ACAAEYIQKIKETDEANIEKWTLQKLL
Sc_INO2     IPANIEDDFVKVR-KWKH-----VQM-E-----KIR--RIN---TK--EA--FERLI-----K-SVR-----TPPKK-----NG-KR-IP-----KHI-IL-TCVMQDKSIRSANEALQHLDDSDX--
Sc_TYE7     KRRAPRRKLLPFC-KQAH-----KKI-E-----KKY--RIN---IN--TK--IARLQ-----C-IIP-----WVASEQTAFEVGDSVKKQDEGAEATAATPLPSAAA--TS-TK-LN-----KSM-IL-EKAVDIIILQNNRRLYEMEVRLKSE
Sc_PHO4     KRSSGALVDDDK-RESH-----KHA-E-----QSR--RNR---LA--VA--LHILA-----S-LIP-----AEWQQQ--VS-AA-PS-----KAT-TV-EAKCYIRRLQNVVY-----
TpbHLH001  KLSNPEATTEER-RLER-----NQR-E-----KER--SNR---IA--SQ--VDTLR-----C-LLQ-----RGLL-----FI-PK-NT-----KST-VL-NEAANYIRLQERQQQMSMEMEGLKRG
TpbHLH002  GSKSHPATQDPTK-RQER-----NAR-E-----KER--SCR---IA--KQ--IDDLR-----S-LLS-----RGGV-----VV-AK-GT-----KST-IL-TEAANYINVLQQQVQWEMDRGALVQ
TpbHLH003  PASKKKKPLTNER-REER-----NMR-E-----KER--SLK---IT--QQ--IHELK-----G-LLS-----IGGV-----IV-PK-GT-----KST-IL-TEAANYIKQLQQQYRSIDRAQLVQE
TpbHLH004  LAVSEDESCKKKR-RNER-----NLR-E-----QER--SHR---IT--DR--IAELK-----G-VLS-----EAG-----VH-FK-QD-----RYS-IL-VSVVNYIKQLQKRKQSLDEBKRLLET
TpbHLH005  QRQQLLQSKAREA-TRER-----NER-E-----QMR--AKK---IT--QL--IEELR-----M-NMQ-----KEGW-----KE-EM-KS-----KYE-IL-SQCKDVMQFLQRSKKEKASIEHTKLL

```

Supplementary Figure 1 – Alignment of the bHLH of all proteins used in this study.

The green bar on the top indicates the region used to perform the ML, NJ and MP analyses in the plant sequences. The red bar indicates the region used to perform the Bayesian analysis in representative eukaryote proteins.
